# Supplementary material
Source: publisher figshare collection journal article supplement (https://acs.figshare.com/ndownloader/files/20309004)
Supplement: Supplementary file 1 [file 20309004]

# Supporting Information

## **One-step Transformation of Metal Meshes to Robust Superhydrophobic and Superoleophilic Meshes for Highly Efficient Oil Spill Cleanup and Oil/Water Separation**

Chao Fu,<sup>†,‡</sup> Lin Gu,<sup>\*,†,§</sup> Zhixiang Zeng,<sup>\*,†</sup> Qunji Xue<sup>†</sup>

<sup>†</sup> Key Laboratory of Marine Materials and Related Technologies, Zhejiang Key Laboratory of Marine Materials and Protective Technologies, Ningbo Institute of Materials Technology and Engineering, Chinese Academy of Sciences, Ningbo 315201, P. R. China

<sup>‡</sup> University of Chinese Academy of Sciences, Beijing 100049, China

<sup>§</sup> School of Chemical Engineering and Technology, Sun Yat-sen University, Zhuhai 519082, P. R. China

---

\*Corresponding authors. E-mail: [gulin5@mail.sysu.edu.cn](mailto:gulin5@mail.sysu.edu.cn) (L. Gu); [zengzhx@nimte.ac.cn](mailto:zengzhx@nimte.ac.cn) (Z. Zeng)

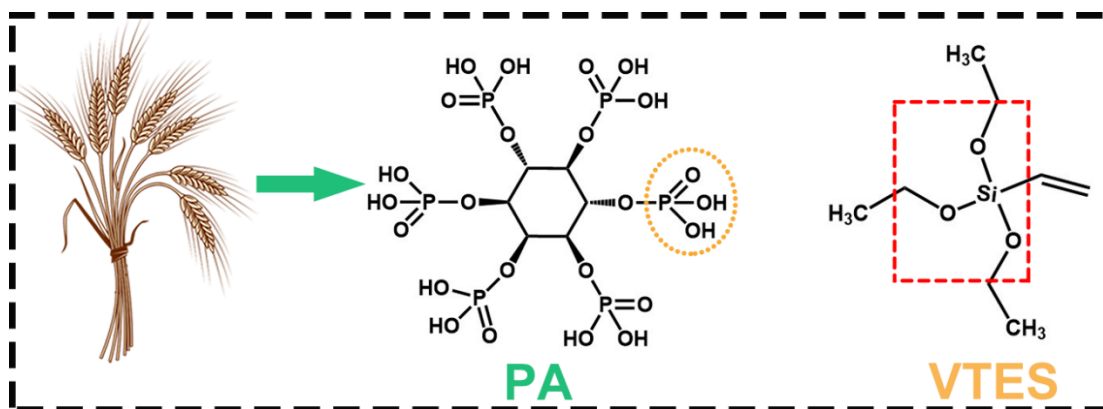

**Scheme S1.** The structure of grains-derived PA and commercial VTES.

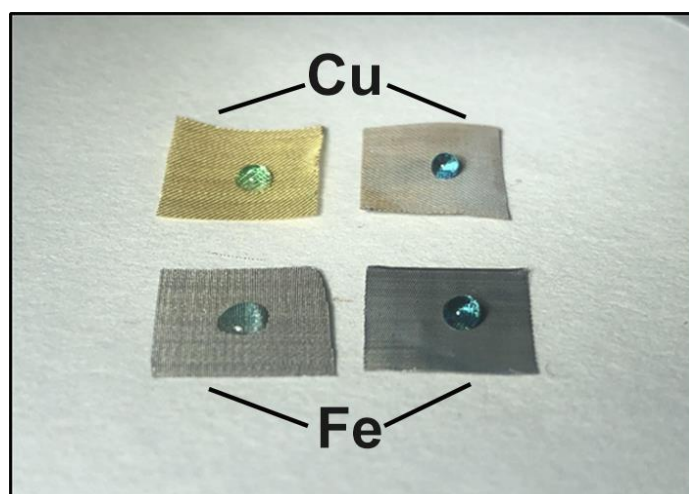

**Scheme S2.** Photos of original and PA/VTES treated Cu and Fe mesh.

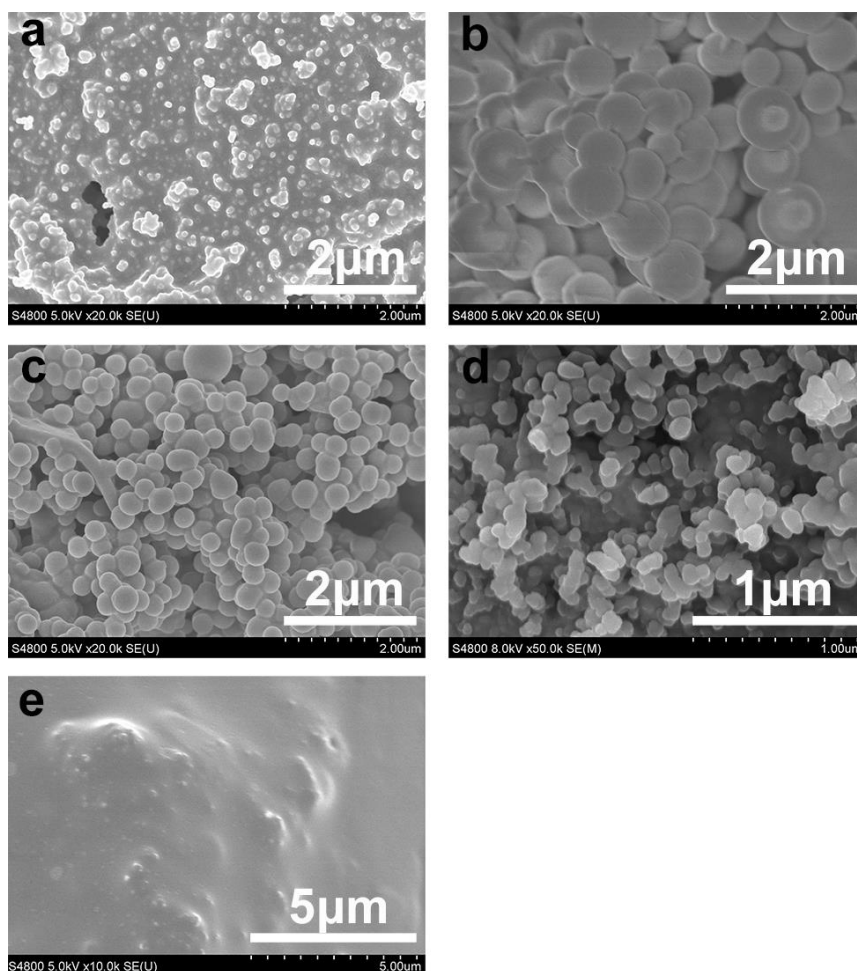

**Figure S1.** SEM images of the meshes with different mass ratio of PA and VTES. (a) PA/VTES=4:1 (b) PA:VTES=2:1 (c) PA:VTES=1:1 (d)PA:VTES=1:2 (e)PA:VTES=1:4

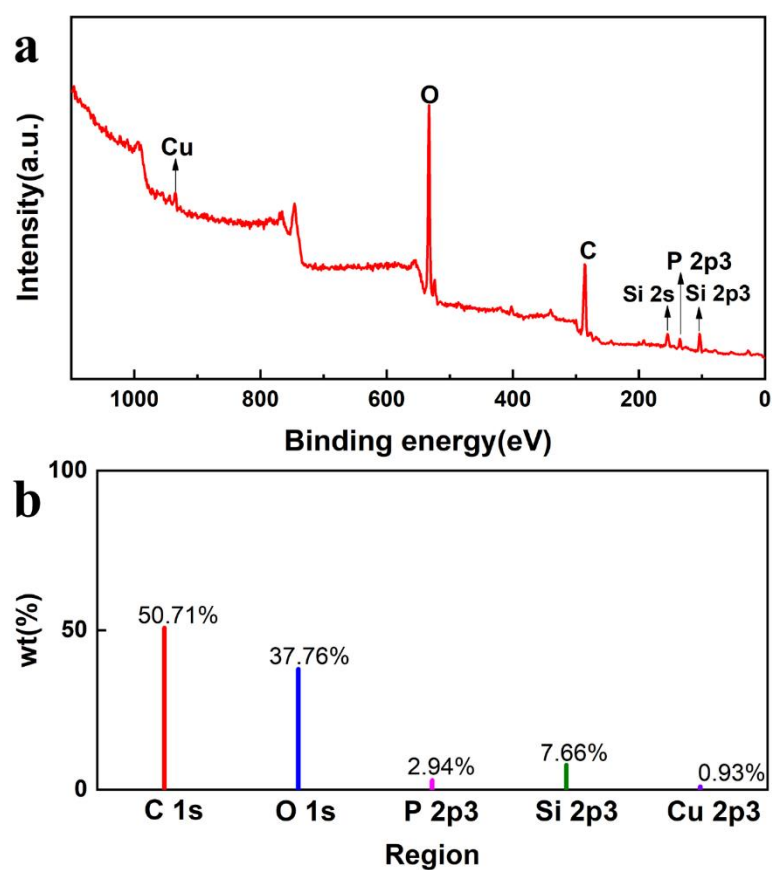

**Figure S2.** (a) XPS spectrum of the PA/VTES/Mesh (b) The detailed chemical composition of the PA/VTES/Mesh

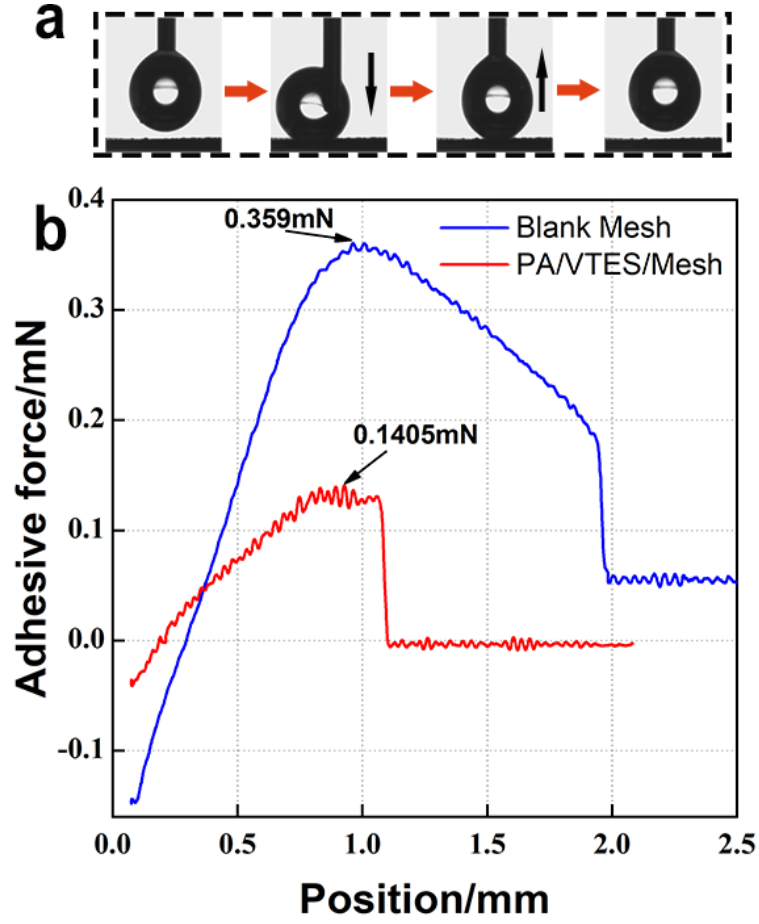

**Figure S3.** (a) Dynamic water-adhesion of PA/VTES/Mesh surface. (b) The adhesive forces of water on the Blank Mesh and PA/VTES/Mesh (PA:VTES=1:2).

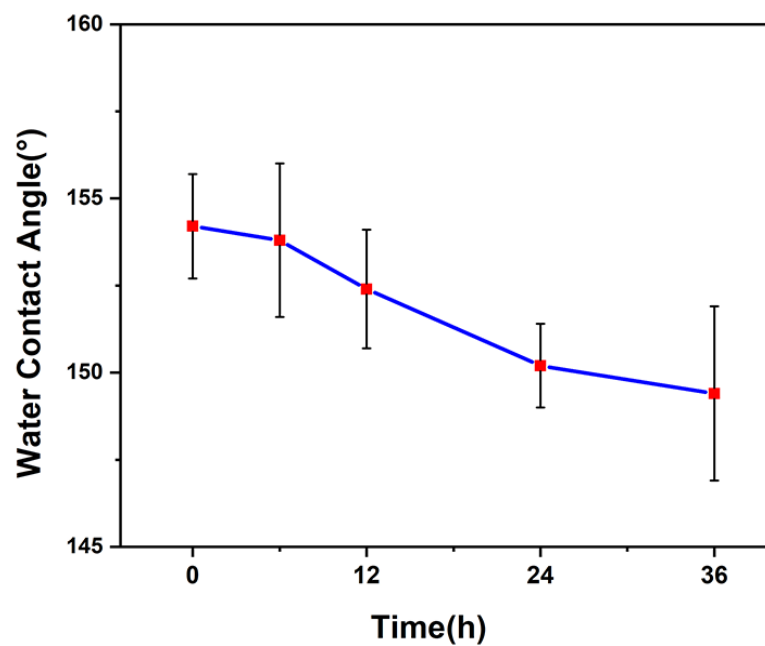

**Figure S4.** The water contact angle of PA/VTES/Mesh immersed in the artificial seawater at the different exposure time.

**Movie S1.** The interaction between water and PA/VTES/Mesh.(AVI)

**Movie S2.** The interaction between oil and PA/VTES/Mesh.(AVI)

**Movie S3.** Separation of oil/water mixtures using PA/VTES/Mesh.(AVI)
